# Supplementary material
Source: Research Square preprint supplement (doi:10.21203/rs.3.rs-9289839/v1)
Supplement: Supplementary file 1 [file f9f25385fdf87b9eeb59eba2.docx]

**APPENDIX: ADDITIONAL FIGURES AND TABLES**

**Source for all: Own construction using the WIID**

Figure A1. Global mean and median net income per capita

median

mean

Figure A2. Global net income inequality: Overall, between and within countries

Note: between = inequality in the smoothed distribution (i.e., no inequality within countries); within = inequality in the standardized distribution (i.e., no inequality between countries).

between

within

overall

Figure A3. Global income inequality between and within classes (optimal approach)

information

loss

between

overall

within

Note: between = inequality in the smoothed distribution (i.e., no inequality within classes); within = inequality in the standardized distribution (i.e., no inequality between classes). The difference between ‘overall’ and ‘between-class’ inequality is the information loss associated with the 4-spike simplified distribution.

Figure A4. Global income polarization between classes (optimal approach)

between

overall

within-class identification

Note: Esteban, Gradín & Ray’s (2007) polarization index (). Between = polarization in the smoothed distribution (i.e., no inequality within countries). Overall = polarization between classes minus ‘within-class identification’ (information loss after aggregation using the Gini index; ).

Figure A5. Simplified distribution: global income classes

a. Absolute approach

b. Relative approach

c. Optimal approach

Figure A6. Changing composition in the Western European global middle class by area (absolute approach)

SSA

LAC

Lower-middle class

Lower class

India

Developed

China

Other

India

Upper-middle class

Upper class

Note: Global income classes are defined using the 2022 WE boundaries (anchored in constant international dollars). 2023-2030 is a projection. The middle class (total) comprises the lower- and upper-middle classes. Developed countries: Sixteen Western European countries, the US, Canada, New Zealand, Australia, and Japan. LAC = Latin America and the Caribbean; SSA = Sub-Saharan Africa.

Table A1. Boundaries by global income class

|  | Upper bound by income class | | | | | |
| --- | --- | --- | --- | --- | --- | --- |
|  | Lower | | Lower-middle | | Upper-middle | |
| *Absolute* | USD | % median | USD | % median | USD | % median |
| 1950 | 3,325 | 479 | 9,362 | 1,348 | 24,092 | 3,469 |
| 1980 | 3,325 | 305 | 9,362 | 859 | 24,092 | 2,210 |
| 1990 | 3,325 | 255 | 9,362 | 719 | 24,092 | 1,850 |
| 2000 | 3,325 | 183 | 9,362 | 515 | 24,092 | 1,325 |
| 2010 | 3,325 | 111 | 9,362 | 312 | 24,092 | 803 |
| 2020 | 3,325 | 84 | 9,362 | 235 | 24,092 | 606 |
| 2022 | 3,325 | 77 | 9,362 | 215 | 24,092 | 555 |
| 2030 | 3,325 | 65 | 9,362 | 184 | 24,092 | 472 |
| *Relative* |  |  |  |  |  |  |
| 1950 | 532 | 77 | 1,497 | 215 | 3,852 | 555 |
| 1980 | 834 | 77 | 2,350 | 215 | 6,047 | 555 |
| 1990 | 997 | 77 | 2,806 | 215 | 7,221 | 555 |
| 2000 | 1,391 | 77 | 3,918 | 215 | 10,082 | 555 |
| 2010 | 2,296 | 77 | 6,464 | 215 | 16,635 | 555 |
| 2020 | 3,045 | 77 | 8,574 | 215 | 22,064 | 555 |
| 2022 | 3,325 | 77 | 9,362 | 215 | 24,092 | 555 |
| 2030 | 3,904 | 77 | 10,991 | 215 | 28,285 | 555 |
| *Optimal* |  |  |  |  |  |  |
| 1950 | 591 | 85 | 2,254 | 325 | 6,415 | 924 |
| 1980 | 1,173 | 108 | 5,400 | 495 | 14,807 | 1,358 |
| 1990 | 1,324 | 102 | 5,466 | 420 | 17,066 | 1,311 |
| 2000 | 1,669 | 92 | 5,736 | 316 | 19,418 | 1,068 |
| 2010 | 2,428 | 81 | 7,156 | 239 | 20,354 | 679 |
| 2020 | 3,064 | 77 | 8,613 | 216 | 22,419 | 563 |
| 2022 | 3,325 | 77 | 9,362 | 215 | 24,092 | 555 |
| 2030 | 3,778 | 74 | 10,566 | 207 | 26,343 | 517 |

Note: Optimal boundaries that produce four income classes are computed globally for selected years, including a projection for 2030. They refer to net income, measured in constant (2022) international dollars.

Table A2. Population shares (%) by global income class

|  | Lower | Lower-  middle | Upper-  middle | Upper | Total  Middle  class |
| --- | --- | --- | --- | --- | --- |
| *Absolute* |  |  |  |  |  |
| 1950 | 81.2 | 14.4 | 3.9 | 0.4 | 18.3 |
| 1980 | 68.2 | 15.5 | 13.2 | 3.1 | 28.7 |
| 1990 | 69.3 | 14.3 | 12.0 | 4.3 | 26.3 |
| 2000 | 66.9 | 16.7 | 11.0 | 5.4 | 27.7 |
| 2010 | 53.0 | 26.2 | 14.3 | 6.5 | 40.5 |
| 2020 | 44.4 | 30.1 | 17.8 | 7.8 | 47.9 |
| 2022 | 41.8 | 30.4 | 19.0 | 8.9 | 49.4 |
| 2030 | 37.0 | 30.5 | 21.4 | 11.1 | 51.9 |
| *Relative* |  |  |  |  |  |
| 1950 | 43.7 | 22.2 | 17.9 | 16.1 | 40.1 |
| 1980 | 44.2 | 19.3 | 13.2 | 23.3 | 32.5 |
| 1990 | 42.1 | 24.4 | 13.5 | 19.9 | 37.9 |
| 2000 | 41.6 | 28.9 | 13.8 | 15.7 | 42.7 |
| 2010 | 41.9 | 29.4 | 17.4 | 11.4 | 46.8 |
| 2020 | 41.9 | 30.5 | 18.7 | 8.9 | 49.2 |
| 2022 | 41.8 | 30.4 | 19.0 | 8.9 | 49.4 |
| 2030 | 42.0 | 29.7 | 19.8 | 8.5 | 49.5 |
| *Optimal* |  |  |  |  |  |
| 1950 | 46.5 | 27.2 | 17.9 | 8.3 | 45.1 |
| 1980 | 51.2 | 23.8 | 16.3 | 8.6 | 40.1 |
| 1990 | 50.2 | 26.4 | 15.3 | 8.1 | 41.7 |
| 2000 | 47.4 | 29.8 | 15.1 | 7.7 | 44.9 |
| 2010 | 43.4 | 30.2 | 17.7 | 8.6 | 47.9 |
| 2020 | 42.0 | 30.3 | 18.9 | 8.8 | 49.2 |
| 2022 | 41.8 | 30.4 | 19.0 | 8.9 | 49.4 |
| 2030 | 41.0 | 29.7 | 19.6 | 9.7 | 49.3 |

Note: All baseline-year (2022) estimates are based on optimal boundaries. For other years, boundaries are either optimal (relative) or anchored to the baseline year, either in dollars (absolute) or as a percentage of the median (semi-relative). Estimates for 2030 are projections assuming constant within-country relative distributions.

Table A3. Income shares (%) by global income class

|  | Lower | Lower-  middle | Upper-  middle | Upper | Total  Middle  Class |
| --- | --- | --- | --- | --- | --- |
| *Absolute* |  |  |  |  |  |
| 1950 | 30.3 | 36.9 | 25.6 | 7.2 | 62.5 |
| 1980 | 12.8 | 20.1 | 42.3 | 24.8 | 62.4 |
| 1990 | 14.0 | 16.5 | 36.2 | 33.3 | 52.7 |
| 2000 | 14.7 | 15.9 | 29.6 | 39.8 | 45.5 |
| 2010 | 10.8 | 20.5 | 30.2 | 38.5 | 50.7 |
| 2020 | 8.1 | 20.4 | 31.7 | 39.7 | 52.1 |
| 2022 | 7.1 | 19.2 | 31.5 | 42.2 | 50.7 |
| 2030 | 5.7 | 17.2 | 31.5 | 45.6 | 48.7 |
| *Relative* |  |  |  |  |  |
| 1950 | 4.2 | 9.6 | 21.0 | 65.2 | 30.6 |
| 1980 | 4.0 | 5.9 | 11.3 | 78.7 | 17.2 |
| 1990 | 4.3 | 8.1 | 12.3 | 75.4 | 20.4 |
| 2000 | 5.1 | 11.9 | 14.9 | 68.0 | 26.8 |
| 2010 | 6.5 | 16.2 | 25.2 | 52.1 | 41.4 |
| 2020 | 7.2 | 19.1 | 30.8 | 42.9 | 49.9 |
| 2022 | 7.1 | 19.2 | 31.5 | 42.2 | 50.7 |
| 2030 | 7.5 | 19.5 | 33.8 | 39.1 | 53.3 |
| *Optimal* |  |  |  |  |  |
| 1950 | 4.9 | 15.7 | 32.3 | 47.1 | 48.0 |
| 1980 | 5.5 | 13.7 | 33.6 | 47.2 | 47.3 |
| 1990 | 6.1 | 14.1 | 31.4 | 48.4 | 45.5 |
| 2000 | 6.7 | 15.9 | 29.1 | 48.3 | 45.0 |
| 2010 | 7.0 | 18.0 | 29.9 | 45.1 | 47.9 |
| 2020 | 7.2 | 19.1 | 31.3 | 42.4 | 50.4 |
| 2022 | 7.1 | 19.2 | 31.5 | 42.2 | 50.7 |
| 2030 | 7.1 | 18.9 | 31.8 | 42.2 | 50.7 |

Note: All baseline-year (2022) estimates are based on optimal boundaries. For other years, boundaries are either optimal (relative) or anchored to the baseline year, either in dollars (absolute) or as a percentage of the median (semi-relative). Estimates for 2030 are projections assuming constant within-country relative distributions.

Table A4. Income means (USD) by global income class.

|  | Lower | Lower-  middle | Upper-  middle | Upper | Total  Middle  class |
| --- | --- | --- | --- | --- | --- |
| *Absolute* |  |  |  |  |  |
| 1950 | 790 | 5,436 | 13,798 | 34,528 | 7,232 |
| 1980 | 862 | 5,955 | 14,649 | 37,012 | 9,959 |
| 1990 | 1,016 | 5,761 | 15,109 | 38,389 | 10,025 |
| 2000 | 1,257 | 5,457 | 15,353 | 41,743 | 9,390 |
| 2010 | 1,463 | 5,598 | 15,092 | 42,235 | 8,953 |
| 2020 | 1,538 | 5,723 | 15,010 | 42,866 | 9,176 |
| 2022 | 1,553 | 5,772 | 15,109 | 43,389 | 9,364 |
| 2030 | 1,590 | 5,790 | 15,101 | 44,078 | 9,636 |
| *Relative* |  |  |  |  |  |
| 1950 | 202 | 918 | 2,478 | 8,580 | 1,616 |
| 1980 | 412 | 1,414 | 3,930 | 15,474 | 2,437 |
| 1990 | 509 | 1,659 | 4,554 | 18,972 | 2,691 |
| 2000 | 700 | 2,357 | 6,190 | 24,798 | 3,594 |
| 2010 | 1,115 | 3,945 | 10,373 | 32,776 | 6,335 |
| 2020 | 1,441 | 5,289 | 13,837 | 40,344 | 8,546 |
| 2022 | 1,553 | 5,772 | 15,109 | 43,389 | 9,364 |
| 2030 | 1,830 | 6,776 | 17,580 | 49,685 | 11,100 |
| *Optimal* |  |  |  |  |  |
| 1950 | 224 | 1,220 | 3,823 | 11,999 | 2,254 |
| 1980 | 491 | 2,639 | 9,426 | 25,035 | 5,400 |
| 1990 | 611 | 2,681 | 10,261 | 29,936 | 5,467 |
| 2000 | 801 | 3,052 | 11,042 | 35,836 | 5,736 |
| 2010 | 1,160 | 4,254 | 12,098 | 37,304 | 7,153 |
| 2020 | 1,447 | 5,306 | 13,933 | 40,732 | 8,617 |
| 2022 | 1,553 | 5,772 | 15,109 | 43,389 | 9,364 |
| 2030 | 1,780 | 6,538 | 16,650 | 46,899 | 10,566 |

Note: All baseline-year (2022) estimates are based on optimal boundaries. For other years, boundaries are either optimal (relative) or anchored to the baseline year, either in dollars (absolute) or as a percentage of the median (semi-relative). Estimates for 2030 are projections assuming constant within-country relative distributions. Estimates are based on net income, measured in constant (2022) international dollars.

Table A5. Within-class inequality (Gini) (optimal boundaries)

|  | Lower | Lower-  middle | Upper-  middle | Upper | Within classes  (weighted  average) | Between  classes | Total | Between classes/total (%) |
| --- | --- | --- | --- | --- | --- | --- | --- | --- |
| 1950 | 41.3 | 21.6 | 16.9 | 26.3 | 30.3 | 64.9 | 68.8 | 94.3 |
| 1980 | 31.3 | 25.5 | 16.3 | 23.0 | 26.8 | 66.3 | 69.9 | 94.8 |
| 1990 | 31.3 | 23.5 | 18.3 | 23.5 | 26.6 | 66.7 | 70.3 | 94.9 |
| 2000 | 31.0 | 19.8 | 20.1 | 25.7 | 25.6 | 65.3 | 69.0 | 94.6 |
| 2010 | 32.1 | 17.6 | 17.2 | 25.9 | 24.6 | 59.7 | 63.6 | 93.9 |
| 2020 | 33.7 | 16.8 | 15.7 | 25.6 | 24.4 | 57.1 | 61.0 | 93.6 |
| 2022 | 33.8 | 16.9 | 15.5 | 25.2 | 24.4 | 56.9 | 60.8 | 93.6 |
| 2030 | 34.0 | 16.7 | 15.1 | 25.1 | 24.3 | 56.0 | 59.9 | 93.5 |

Note: All estimates are based on optimal boundaries. Estimates for 2030 are projections assuming constant within-country relative distributions. The Gini index is defined as a value between 0 and 100.

Table A6. Composition of global income classes (%) by area (absolute approach)

| Year | Area | Global class | | | | Middle  Class  (total) | World |
| --- | --- | --- | --- | --- | --- | --- | --- |
|  |  | Lower | Lower-middle | Upper-middle | Upper |  |  |
| 1950 | Developed countries | 11.2 | 66.0 | 89.4 | 86.5 | 71.0 | 22.5 |
|  | China | 26.9 | 0.0 | 0.0 | 0.0 | 0.0 | 21.8 |
|  | India | 16.9 | 1.0 | 0.0 | 0.0 | 0.8 | 13.9 |
|  | Latin America and the Caribbean | 7.1 | 5.1 | 4.4 | 2.5 | 5.0 | 6.7 |
|  | Sub-Saharan Africa | 8.4 | 2.6 | 2.5 | 7.6 | 2.6 | 7.4 |
|  | Other | 29.5 | 25.3 | 3.8 | 3.4 | 20.7 | 27.7 |
|  | All areas | 100 | 100 | 100 | 100 | 100 | 100 |
| 1980 | Developed countries | 0.8 | 29.6 | 69.2 | 82.3 | 47.8 | 16.8 |
|  | China | 32.5 | 0.0 | 0.0 | 0.0 | 0.0 | 22.2 |
|  | India | 22.1 | 2.0 | 0.0 | 0.0 | 1.1 | 15.4 |
|  | Latin America and the Caribbean | 7.0 | 16.1 | 5.1 | 4.9 | 11.1 | 8.1 |
|  | Sub-Saharan Africa | 11.0 | 6.0 | 1.6 | 2.1 | 4.0 | 8.7 |
|  | Other | 26.6 | 46.2 | 24.1 | 10.6 | 36.1 | 28.8 |
|  | All areas | 100 | 100 | 100 | 100 | 100 | 100 |
| 1990 | Developed countries | 0.5 | 18.7 | 68.0 | 84.5 | 41.2 | 14.9 |
|  | China | 30.9 | 1.5 | 0.0 | 0.0 | 0.8 | 21.7 |
|  | India | 22.7 | 3.4 | 0.0 | 0.0 | 1.8 | 16.2 |
|  | Latin America and the Caribbean | 7.5 | 16.6 | 4.7 | 3.6 | 11.1 | 8.3 |
|  | Sub-Saharan Africa | 12.5 | 5.8 | 1.7 | 1.6 | 3.9 | 9.7 |
|  | Other | 25.9 | 54.1 | 25.6 | 10.3 | 41.1 | 29.2 |
|  | All areas | 100 | 100 | 100 | 100 | 100 | 100 |
| 2000 | Developed countries | 0.4 | 10.1 | 63.2 | 86.0 | 31.2 | 13.6 |
|  | China | 27.2 | 13.6 | 1.9 | 0.0 | 8.9 | 20.6 |
|  | India | 23.5 | 7.2 | 1.6 | 0.0 | 4.9 | 17.1 |
|  | Latin America and the Caribbean | 7.1 | 16.1 | 7.2 | 3.4 | 12.5 | 8.4 |
|  | Sub-Saharan Africa | 14.7 | 5.2 | 2.0 | 1.0 | 3.9 | 11.0 |
|  | Other | 27.0 | 47.9 | 24.1 | 9.7 | 38.4 | 29.2 |
|  | All areas | 100 | 100 | 100 | 100 | 100 | 100 |
| 2010 | Developed countries | 0.5 | 5.3 | 43.1 | 76.2 | 18.7 | 12.8 |
|  | China | 17.9 | 30.2 | 12.1 | 3.0 | 23.8 | 19.3 |
|  | India | 27.4 | 10.1 | 3.7 | 0.0 | 7.9 | 17.7 |
|  | Latin America and the Caribbean | 7.1 | 12.5 | 7.6 | 3.7 | 10.8 | 8.4 |
|  | Sub-Saharan Africa | 20.0 | 6.3 | 2.4 | 1.2 | 4.9 | 12.7 |
|  | Other | 27.1 | 35.6 | 31.1 | 15.9 | 34.0 | 29.2 |
|  | All areas | 100 | 100 | 100 | 100 | 100 | 100 |
| 2020 | Developed countries | 0.6 | 3.7 | 30.9 | 66.4 | 13.8 | 12.0 |
|  | China | 9.8 | 27.2 | 27.6 | 9.3 | 27.3 | 18.2 |
|  | India | 26.5 | 17.2 | 4.0 | 2.3 | 12.3 | 17.8 |
|  | Latin America and the Caribbean | 8.5 | 10.9 | 5.3 | 2.7 | 8.8 | 8.2 |
|  | Sub-Saharan Africa | 27.5 | 6.6 | 2.3 | 1.0 | 5.0 | 14.7 |
|  | Other | 27.1 | 34.4 | 29.9 | 18.3 | 32.7 | 29.1 |
|  | All areas | 100 | 100 | 100 | 100 | 100 | 100 |
| 2022 | Developed countries | 0.3 | 3.1 | 26.4 | 65.6 | 12.0 | 11.9 |
|  | China | 8.5 | 25.3 | 30.1 | 10.1 | 27.2 | 17.9 |
|  | India | 25.5 | 19.3 | 5.6 | 2.0 | 14.1 | 17.8 |
|  | Latin America and the Caribbean | 8.1 | 11.3 | 5.9 | 2.8 | 9.2 | 8.2 |
|  | Sub-Saharan Africa | 30.1 | 6.8 | 2.4 | 0.9 | 5.1 | 15.2 |
|  | Other | 27.5 | 34.2 | 29.6 | 18.6 | 32.4 | 29.1 |
|  | All areas | 100 | 100 | 100 | 100 | 100 | 100 |
| 2030 | Developed countries | 0.2 | 2.6 | 20.4 | 54.6 | 10.0 | 11.3 |
|  | China | 6.6 | 19.4 | 29.9 | 14.8 | 23.7 | 16.4 |
|  | India | 21.6 | 22.8 | 11.6 | 3.2 | 18.2 | 17.8 |
|  | Latin America and the Caribbean | 7.9 | 11.1 | 6.0 | 3.9 | 9.0 | 8.0 |
|  | Sub-Saharan Africa | 37.2 | 9.0 | 2.9 | 1.0 | 6.5 | 17.2 |
|  | Other | 26.4 | 35.1 | 29.2 | 22.5 | 32.7 | 29.2 |
|  | All areas | 100 | 100 | 100 | 100 | 100 | 100 |

Note: Income classes are defined using 2022 optimal boundaries anchored in international constant dollars. The middle class (total) comprises the lower- and upper-middle classes—percentage of the population in each global class residing in each area (columns sum to 100).

Table A7. Composition of areas (%) by global income class (absolute approach)

| Year | Area | Global class | | | | Middle  class  (total) | World |
| --- | --- | --- | --- | --- | --- | --- | --- |
|  |  | Lower | Lower-middle | Upper-middle | Upper |  |  |
| 1950 | Developed countries | 40.5 | 42.2 | 15.6 | 1.7 | 57.8 | 100 |
|  | China | 100.0 | 0.0 | 0.0 | 0.0 | 0.0 | 100 |
|  | India | 99.0 | 1.0 | 0.0 | 0.0 | 1.0 | 100 |
|  | Latin America and the Caribbean | 86.2 | 11.1 | 2.6 | 0.2 | 13.6 | 100 |
|  | Sub-Saharan Africa | 93.1 | 5.1 | 1.4 | 0.5 | 6.5 | 100 |
|  | Other | 86.3 | 13.1 | 0.5 | 0.1 | 13.7 | 100 |
|  | All areas | 81.2 | 14.4 | 3.9 | 0.4 | 18.3 | 100 |
| 1980 | Developed countries | 3.3 | 27.2 | 54.4 | 15.0 | 81.6 | 100 |
|  | China | 100 | 0.0 | 0.0 | 0.0 | 0.0 | 100 |
|  | India | 98.0 | 2.0 | 0.0 | 0.0 | 2.0 | 100 |
|  | Latin America and the Caribbean | 58.8 | 30.9 | 8.4 | 1.9 | 39.3 | 100 |
|  | Sub-Saharan Africa | 86.2 | 10.7 | 2.4 | 0.7 | 13.1 | 100 |
|  | Other | 62.9 | 24.9 | 11.1 | 1.1 | 36.0 | 100 |
|  | All areas | 68.2 | 15.5 | 13.2 | 3.1 | 28.7 | 100 |
| 1990 | Developed countries | 2.4 | 18.0 | 54.9 | 24.7 | 72.9 | 100 |
|  | China | 99.0 | 1.0 | 0.0 | 0.0 | 1.0 | 100 |
|  | India | 97.0 | 3.0 | 0.0 | 0.0 | 3.0 | 100 |
|  | Latin America and the Caribbean | 62.7 | 28.6 | 6.8 | 1.9 | 35.4 | 100 |
|  | Sub-Saharan Africa | 88.7 | 8.5 | 2.1 | 0.7 | 10.5 | 100 |
|  | Other | 61.5 | 26.5 | 10.5 | 1.5 | 37.0 | 100 |
|  | All areas | 69.3 | 14.3 | 12.0 | 4.3 | 26.3 | 100 |
| 2000 | Developed countries | 2.1 | 12.4 | 51.1 | 34.4 | 63.5 | 100 |
|  | China | 88.0 | 11.0 | 1.0 | 0.0 | 12.0 | 100 |
|  | India | 92.0 | 7.0 | 1.0 | 0.0 | 8.0 | 100 |
|  | Latin America and the Caribbean | 56.6 | 31.8 | 9.4 | 2.2 | 41.2 | 100 |
|  | Sub-Saharan Africa | 89.6 | 7.9 | 2.0 | 0.5 | 9.9 | 100 |
|  | Other | 61.8 | 27.3 | 9.1 | 1.8 | 36.4 | 100 |
|  | All areas | 66.9 | 16.7 | 11.0 | 5.4 | 27.7 | 100 |
| 2010 | Developed countries | 2.0 | 10.8 | 48.3 | 38.8 | 59.1 | 100 |
|  | China | 49.0 | 41.0 | 9.0 | 1.0 | 50.0 | 100 |
|  | India | 82.0 | 15.0 | 3.0 | 0.0 | 18.0 | 100 |
|  | Latin America and the Caribbean | 45.1 | 39.1 | 12.9 | 2.9 | 52.0 | 100 |
|  | Sub-Saharan Africa | 83.8 | 12.9 | 2.7 | 0.6 | 15.6 | 100 |
|  | Other | 49.2 | 32.0 | 15.3 | 3.6 | 47.3 | 100 |
|  | All areas | 53.0 | 26.2 | 14.3 | 6.5 | 40.5 | 100 |
| 2020 | Developed countries | 2.0 | 9.2 | 45.7 | 43.0 | 54.9 | 100 |
|  | China | 24.0 | 45.0 | 27.0 | 4.0 | 72.0 | 100 |
|  | India | 66.0 | 29.0 | 4.0 | 1.0 | 33.0 | 100 |
|  | Latin America and the Caribbean | 45.9 | 40.1 | 11.5 | 2.6 | 51.6 | 100 |
|  | Sub-Saharan Africa | 83.1 | 13.6 | 2.8 | 0.5 | 16.4 | 100 |
|  | Other | 41.3 | 35.5 | 18.3 | 4.9 | 53.8 | 100 |
|  | All areas | 44.4 | 30.1 | 17.8 | 7.8 | 47.8 | 100 |
| 2022 | Developed countries | 1.0 | 7.8 | 42.2 | 48.9 | 50.0 | 100 |
|  | China | 20.0 | 43.0 | 32.0 | 5.0 | 75.0 | 100 |
|  | India | 60.0 | 33.0 | 6.0 | 1.0 | 39.0 | 100 |
|  | Latin America and the Caribbean | 41.3 | 42.0 | 13.7 | 3.0 | 55.6 | 100 |
|  | Sub-Saharan Africa | 82.8 | 13.6 | 3.0 | 0.5 | 16.7 | 100 |
|  | Other | 39.4 | 35.7 | 19.3 | 5.7 | 54.9 | 100 |
|  | All areas | 41.8 | 30.4 | 19.0 | 8.9 | 49.3 | 100 |
| 2030 | Developed countries | 0.8 | 7.0 | 38.7 | 53.5 | 45.7 | 100 |
|  | China | 15.0 | 36.0 | 39.0 | 10.0 | 75.0 | 100 |
|  | India | 45.0 | 39.0 | 14.0 | 2.0 | 53.0 | 100 |
|  | Latin America and the Caribbean | 36.2 | 42.3 | 16.1 | 5.4 | 58.3 | 100 |
|  | Sub-Saharan Africa | 79.9 | 15.9 | 3.6 | 0.6 | 19.4 | 100 |
|  | Other | 33.5 | 36.6 | 21.4 | 8.5 | 58.0 | 100 |
|  | All areas | 37.0 | 30.5 | 21.4 | 11.1 | 51.9 | 100 |

Note: Income classes are defined using 2022 optimal boundaries in constant international dollars. The middle class (total) comprises the lower- and upper-middle classes. Percentage of the population in each area belonging to each class (rows sum to 100).

Source: Own construction using the WIID (see data section).

Table A8. Composition of global income classes (%) by area (absolute approach, Western European middle class)

| Year | Area | Global class | | | | Middle  class  (total) | World |
| --- | --- | --- | --- | --- | --- | --- | --- |
|  |  | Lower | Lower-middle | Upper-middle | Upper |  |  |
| 1950 | Developed | 19.4 | 89.4 | 89.9 | 0.0 | 89.5 | 22.5 |
|  | China | 22.8 | 0.0 | 0.0 | 0.0 | 0.0 | 21.8 |
|  | India | 14.5 | 0.0 | 0.0 | 0.0 | 0.0 | 13.9 |
|  | LAC | 6.8 | 4.2 | 3.5 | 0.3 | 4.1 | 6.7 |
|  | SSA | 7.6 | 2.8 | 3.2 | 63.1 | 2.8 | 7.4 |
|  | Rest | 28.9 | 3.6 | 3.5 | 36.7 | 3.6 | 27.7 |
|  | World | 100 | 100 | 100 | 100 | 100 | 100 |
| 1980 | Developed | 6.1 | 70.3 | 82.1 | 72.1 | 71.6 | 16.8 |
|  | China | 26.5 | 0.0 | 0.0 | 0.0 | 0.0 | 22.2 |
|  | India | 18.4 | 0.0 | 0.0 | 0.0 | 0.0 | 15.4 |
|  | LAC | 8.7 | 5.1 | 5.5 | 1.7 | 5.1 | 8.1 |
|  | SSA | 10.1 | 1.6 | 1.5 | 4.9 | 1.6 | 8.7 |
|  | Rest | 30.2 | 23.0 | 10.8 | 21.4 | 21.7 | 28.8 |
|  | World | 100 | 100 | 100 | 100 | 100 | 100 |
| 1990 | Developed | 3.6 | 69.5 | 84.6 | 83.3 | 72.0 | 14.9 |
|  | China | 25.9 | 0.0 | 0.0 | 0.0 | 0.0 | 21.7 |
|  | India | 19.4 | 0.0 | 0.0 | 0.0 | 0.0 | 16.2 |
|  | LAC | 9.0 | 4.7 | 3.8 | 0.3 | 4.5 | 8.3 |
|  | SSA | 11.3 | 1.7 | 1.1 | 3.3 | 1.6 | 9.7 |
|  | Rest | 30.7 | 24.1 | 10.6 | 13.1 | 21.9 | 29.2 |
|  | World | 100 | 100 | 100 | 100 | 100 | 100 |
| 2000 | Developed | 2.4 | 65.6 | 85.9 | 87.5 | 69.9 | 13.6 |
|  | China | 24.5 | 1.7 | 0.0 | 0.0 | 1.3 | 20.6 |
|  | India | 20.3 | 1.4 | 0.0 | 0.0 | 1.1 | 17.1 |
|  | LAC | 8.9 | 6.8 | 3.8 | 1.6 | 6.1 | 8.4 |
|  | SSA | 12.8 | 2.0 | 0.7 | 1.3 | 1.7 | 11.0 |
|  | Rest | 31.2 | 22.6 | 9.6 | 9.6 | 19.8 | 29.2 |
|  | World | 100 | 100 | 100 | 100 | 100 | 100 |
| 2010 | Developed | 2.1 | 46.1 | 76.4 | 82.7 | 52.3 | 12.8 |
|  | China | 22.0 | 10.9 | 4.7 | 0.0 | 9.6 | 19.3 |
|  | India | 21.7 | 3.3 | 0.0 | 0.0 | 2.6 | 17.7 |
|  | LAC | 8.9 | 7.3 | 3.4 | 4.1 | 6.5 | 8.4 |
|  | SSA | 15.5 | 2.4 | 0.6 | 2.4 | 2.0 | 12.7 |
|  | Rest | 29.9 | 30.0 | 14.9 | 10.8 | 26.9 | 29.2 |
|  | World | 100 | 100 | 100 | 100 | 100 | 100 |
| 2020 | Developed | 1.8 | 33.7 | 64.0 | 82.4 | 39.7 | 12.0 |
|  | China | 16.6 | 26.6 | 11.0 | 0.0 | 23.5 | 18.2 |
|  | India | 22.8 | 3.6 | 3.6 | 0.0 | 3.6 | 17.8 |
|  | LAC | 9.5 | 5.0 | 2.6 | 3.2 | 4.5 | 8.2 |
|  | SSA | 19.1 | 2.2 | 0.9 | 1.3 | 1.9 | 14.7 |
|  | Rest | 30.1 | 29.0 | 17.9 | 13.1 | 26.8 | 29.1 |
|  | World | 100 | 100 | 100 | 100 | 100 | 100 |
| 2022 | Developed | 1.4 | 30.0 | 62.8 | 81.9 | 37.0 | 11.9 |
|  | China | 15.6 | 28.0 | 12.6 | 0.0 | 24.8 | 17.9 |
|  | India | 22.9 | 5.1 | 3.1 | 0.0 | 4.7 | 17.8 |
|  | LAC | 9.4 | 5.7 | 2.3 | 3.3 | 5.0 | 8.2 |
|  | SSA | 20.3 | 2.2 | 0.9 | 1.2 | 2.0 | 15.2 |
|  | Rest | 30.3 | 28.9 | 18.2 | 13.6 | 26.7 | 29.1 |
|  | World | 100 | 100 | 100 | 100 | 100 | 100 |
| 2030 | Developed | 1.3 | 23.1 | 57.7 | 55.2 | 30.5 | 11.3 |
|  | China | 12.4 | 28.7 | 15.1 | 8.2 | 25.8 | 16.4 |
|  | India | 22.2 | 11.1 | 2.7 | 0.0 | 9.3 | 17.8 |
|  | LAC | 9.3 | 5.7 | 2.7 | 8.6 | 5.1 | 8.0 |
|  | SSA | 24.5 | 2.7 | 0.9 | 0.8 | 2.3 | 17.2 |
|  | Rest | 30.3 | 28.7 | 20.9 | 27.1 | 27.0 | 29.2 |
|  | World | 100 | 100 | 100 | 100 | 100 | 100 |

Note: Income classes are defined using 2022 Western European boundaries anchored in international constant dollars. The middle class (total) comprises the lower- and upper-middle classes—percentage of the population in each global class residing in each area (columns sum to 100).

Table A9. Composition of areas (%) by global income class (absolute approach, Western European middle class)

| Year | Area | Global class | | | | Total |
| --- | --- | --- | --- | --- | --- | --- |
|  |  | Lower | Lower-middle | Upper-middle |  |  |
| 1950 | Developed | 82.4 | 16.6 | 1.1 | 0.0 | 100 |
|  | China | 100.0 | 0.0 | 0.0 | 0.0 | 100 |
|  | India | 100.0 | 0.0 | 0.0 | 0.0 | 100 |
|  | LAC | 97.3 | 2.6 | 0.1 | 0.0 | 100 |
|  | SSA | 98.2 | 1.6 | 0.1 | 0.1 | 100 |
|  | Rest | 99.4 | 0.5 | 0.0 | 0.0 | 100 |
|  | World | 95.6 | 4.2 | 0.3 | 0.0 | 100 |
| 1980 | Developed | 30.5 | 59.8 | 8.8 | 0.9 | 100 |
|  | China | 100.0 | 0.0 | 0.0 | 0.0 | 100 |
|  | India | 100.0 | 0.0 | 0.0 | 0.0 | 100 |
|  | LAC | 89.8 | 9.0 | 1.2 | 0.0 | 100 |
|  | SSA | 96.9 | 2.7 | 0.3 | 0.1 | 100 |
|  | Rest | 87.7 | 11.4 | 0.7 | 0.2 | 100 |
|  | World | 83.7 | 14.3 | 1.8 | 0.2 | 100 |
| 1990 | Developed | 20.4 | 62.5 | 15.0 | 2.1 | 100 |
|  | China | 100.0 | 0.0 | 0.0 | 0.0 | 100 |
|  | India | 100.0 | 0.0 | 0.0 | 0.0 | 100 |
|  | LAC | 91.2 | 7.5 | 1.2 | 0.0 | 100 |
|  | SSA | 97.2 | 2.4 | 0.3 | 0.1 | 100 |
|  | Rest | 87.9 | 11.0 | 1.0 | 0.2 | 100 |
|  | World | 83.6 | 13.4 | 2.6 | 0.4 | 100 |
| 2000 | Developed | 14.5 | 59.8 | 21.4 | 4.2 | 100 |
|  | China | 99.0 | 1.0 | 0.0 | 0.0 | 100 |
|  | India | 99.0 | 1.0 | 0.0 | 0.0 | 100 |
|  | LAC | 88.3 | 10.0 | 1.5 | 0.1 | 100 |
|  | SSA | 97.5 | 2.2 | 0.2 | 0.1 | 100 |
|  | Rest | 89.0 | 9.6 | 1.1 | 0.2 | 100 |
|  | World | 83.5 | 12.4 | 3.4 | 0.7 | 100 |
| 2010 | Developed | 12.7 | 57.6 | 24.4 | 5.3 | 100 |
|  | China | 90.0 | 9.0 | 1.0 | 0.0 | 100 |
|  | India | 97.0 | 3.0 | 0.0 | 0.0 | 100 |
|  | LAC | 84.1 | 13.9 | 1.6 | 0.4 | 100 |
|  | SSA | 96.6 | 3.0 | 0.2 | 0.2 | 100 |
|  | Rest | 81.2 | 16.4 | 2.1 | 0.3 | 100 |
|  | World | 79.1 | 16.0 | 4.1 | 0.8 | 100 |
| 2020 | Developed | 11.3 | 55.5 | 26.3 | 6.9 | 100 |
|  | China | 68.0 | 29.0 | 3.0 | 0.0 | 100 |
|  | India | 95.0 | 4.0 | 1.0 | 0.0 | 100 |
|  | LAC | 85.9 | 12.2 | 1.6 | 0.4 | 100 |
|  | SSA | 96.6 | 3.0 | 0.3 | 0.1 | 100 |
|  | Rest | 76.8 | 19.7 | 3.0 | 0.5 | 100 |
|  | World | 74.2 | 19.8 | 4.9 | 1.0 | 100 |
| 2022 | Developed | 8.6 | 53.3 | 29.9 | 8.2 | 100 |
|  | China | 63.0 | 33.0 | 4.0 | 0.0 | 100 |
|  | India | 93.0 | 6.0 | 1.0 | 0.0 | 100 |
|  | LAC | 83.3 | 14.6 | 1.6 | 0.5 | 100 |
|  | SSA | 96.5 | 3.1 | 0.3 | 0.1 | 100 |
|  | Rest | 75.0 | 20.9 | 3.5 | 0.6 | 100 |
|  | World | 72.1 | 21.0 | 5.6 | 1.2 | 100 |
| 2030 | Developed | 7.8 | 49.2 | 33.3 | 9.8 | 100 |
|  | China | 51.0 | 42.0 | 6.0 | 1.0 | 100 |
|  | India | 84.0 | 15.0 | 1.0 | 0.0 | 100 |
|  | LAC | 78.4 | 17.2 | 2.2 | 2.1 | 100 |
|  | SSA | 95.8 | 3.7 | 0.4 | 0.1 | 100 |
|  | Rest | 69.9 | 23.6 | 4.7 | 1.9 | 100 |
|  | World | 67.4 | 24.1 | 6.5 | 2.0 | 100 |

Note: Income classes are defined using 2022 Western European boundaries in constant international dollars. The middle class (total) comprises the lower- and upper-middle classes. Percentage of the population in each area belonging to each class (rows sum to 100).

Source: Own construction using the WIID (see data section).
